# Supplementary material for: Room-temperature efficient NO2 gas sensors fabricated by porous 3D flower-like ZnAl-layered double hydroxides
Source: Royal Society of Chemistry journal article supplement (doi:10.1039/d0nj04263c), 2020-01-01
Supplement: d0nj04263c1.pdf [file d0nj04263c1.pdf]

## Supporting Information

*Ye Hong<sup>a</sup>, Di Wang<sup>a</sup>, Chong Lin<sup>a</sup>, Shuiting Luo<sup>a</sup>, Qingjiang Pan<sup>a</sup>, Li Li<sup>\*a,b</sup>, Keying*

*Shi<sup>\*a</sup>*

<sup>a</sup> Key Laboratory of Functional Inorganic Material Chemistry, Ministry of Education,  
School of Chemistry and Material Science, Heilongjiang University, Harbin, 150080,  
P. R. China

---

<sup>a,b</sup> *College of Advanced Agriculture and Ecological Environment, Heilongjiang  
University, Harbin, 150080, P. R. China.*

**\* Corresponding author**

E-mail: lili1993036@hlju.edu.cn; shikeying2008@163.com

Fax: +86 4518667 3647; Tel: +86 451 8660 4920

## Table of contents

S-1 Cover page.

S-2 Table of contents.

S-3 **Fig. S1.** A diagram of the delivery system for the gas sensing process.

S-4 **Table S1.** The gas sensing properties of ZAS-2 compared with the references based on LDHs.

S-5 **Fig. S2.** AFM images and height profiles of ZAS-1 (a, b) and ZAS-3 (c, d).

S-6 **Table S2.** O1s peak position and peak area ratio (%) of the three samples.

S-7 **Fig. S3.** O 1s high-resolution XPS spectra of ZAS-2+NO<sub>2</sub>.

S-8 **Fig. S4.** SEM images of samples: (a) ZA-2; (b) ZAS-2\*; (c) ZAS-2.

S-9 **Fig. S5.** Dynamical response transient of ZAS-1 to 1-100 ppm NO<sub>2</sub>.

S-10 **Fig. S6.** Dynamical response transient of ZAS-3 to 1-100 ppm NO<sub>2</sub>.

S-11 **Fig. S7.** Response time of the ZAS-1, ZAS-2 and ZAS-3 sensor.

S-12 **Fig. S8.** Recovery time of the ZAS-1, ZAS-2 and ZAS-3 sensor.

S-13 **Table S3.** Response and response time of all samples to NO<sub>2</sub> at 25°C in air (RH: 26%).

S-14 **Fig. S9.** Scheme of Kelvin probe of (a) Al(OH)<sub>3</sub>, (b) Zn(OH)<sub>2</sub>.

**Table S1.** The gas sensing properties of ZAS-2 compared with the references based on LDHs.

| Gas sensors             | Operation temperature (°C) | Gas (concentration)             | Response ( $R_a/R_g$ ) | Response/recovery time | References      |
|-------------------------|----------------------------|---------------------------------|------------------------|------------------------|-----------------|
| HPTS/NiFe-LDHs          | Room temperature           | CO <sub>2</sub>                 | --                     | --/--                  | [22]            |
| Zn <sub>2</sub> Al-LDHs | 240°C                      | Ethanol (100 ppm)               | 12.5                   | --/--                  | [23]            |
| PS@Co-LDHs              | 200°C                      | Dimethyl sulfide (125 ppm);     | 3;                     | --/--                  | [24]            |
|                         |                            | Ethanol (4.3 ppm)               | 2.48                   | --/--                  |                 |
| Pt/ZnAl-LDHs            | 450°C                      | CH <sub>4</sub> (500 ppm);      | 5                      | --/--                  | [25]            |
| NiAl-LDHs               | Room temperature           | O <sub>3</sub> (700 ppm)        | 1.84                   | 8 s/74 s               | [26]            |
| <b>ZnAl-LDHs</b>        | <b>Room temperature</b>    | <b>NO<sub>x</sub> (100 ppm)</b> | <b>28.6</b>            | <b>2/29 s</b>          | <b>Our work</b> |

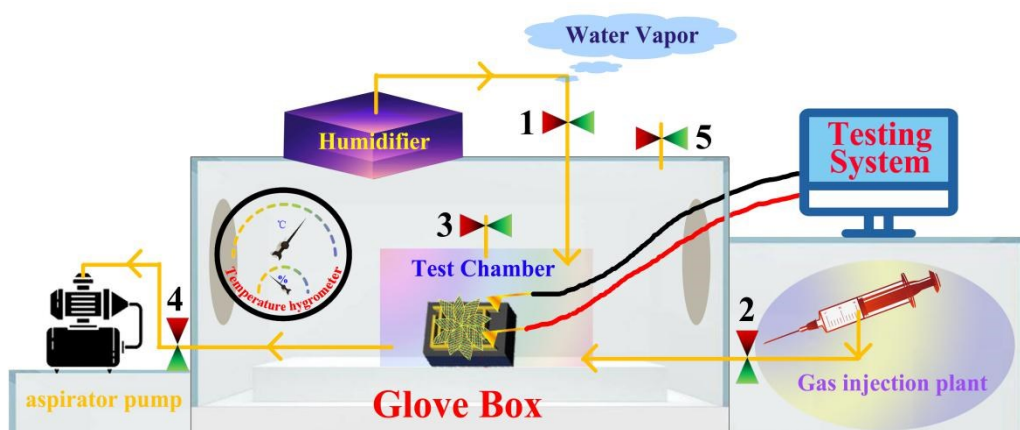

**Fig. S1.** A diagram of the delivery system for the gas sensing process.

Firstly, the prepared interdigital gold electrode sensor is installed in the test chamber, and the valves 3, 4 and 5 are kept open at the same time, so that the air can flow in the test chamber and the glove box for more than or equal to 3 minutes to remove the interference substances in the device.

After flushing, the valve 5 is still open and the valve 3, valve 4 are closed. At the same time, water vapor was injected into the box by valve 1. And the temperature and humidity change are controlled in the box. After reaching the target humidity, close valves 1, 3 and 5 at the same time.

Next, open valve 1 and inject a certain volume of nitrogen oxide gas to observe the resistance change. When the resistance is balanced, open valve 4 and valve 5. Use the air extraction pump to fill the chamber with air to restore the sensor resistance to its original state.

The above is a complete response recovery cycle. Repeat the previous work, inject  $\text{NO}_2$  into the laboratory (control  $\text{NO}_2$  gas concentration with micro syringe), complete

the second response recovery cycle, then measure the resistance change, and so on to get the required test results.

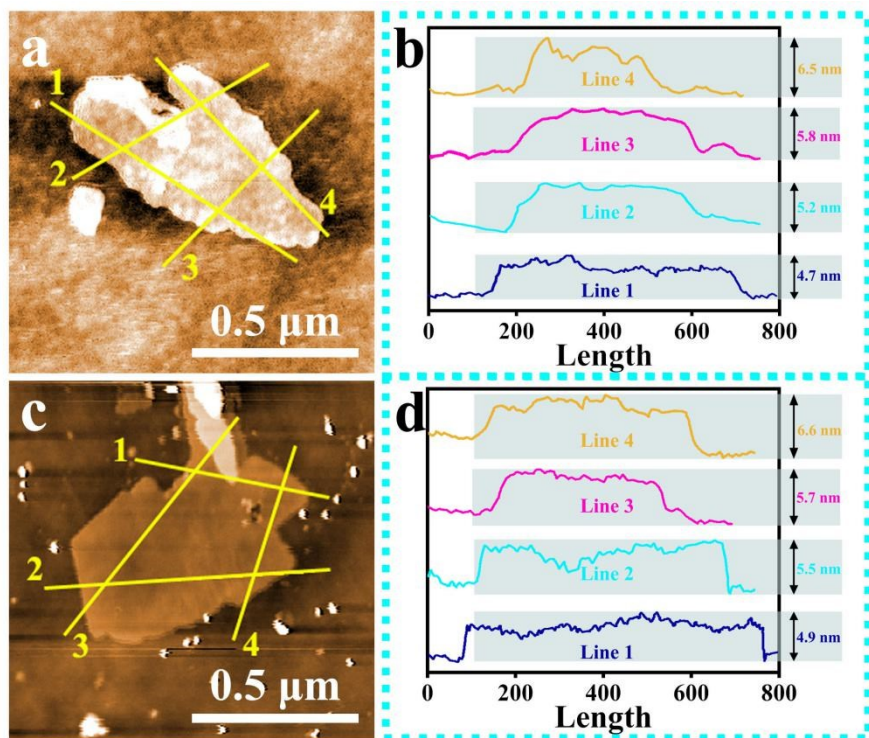

**Fig. S2.** AFM images and height profiles of ZAS-1 (a, b) and ZAS-3 (c, d).

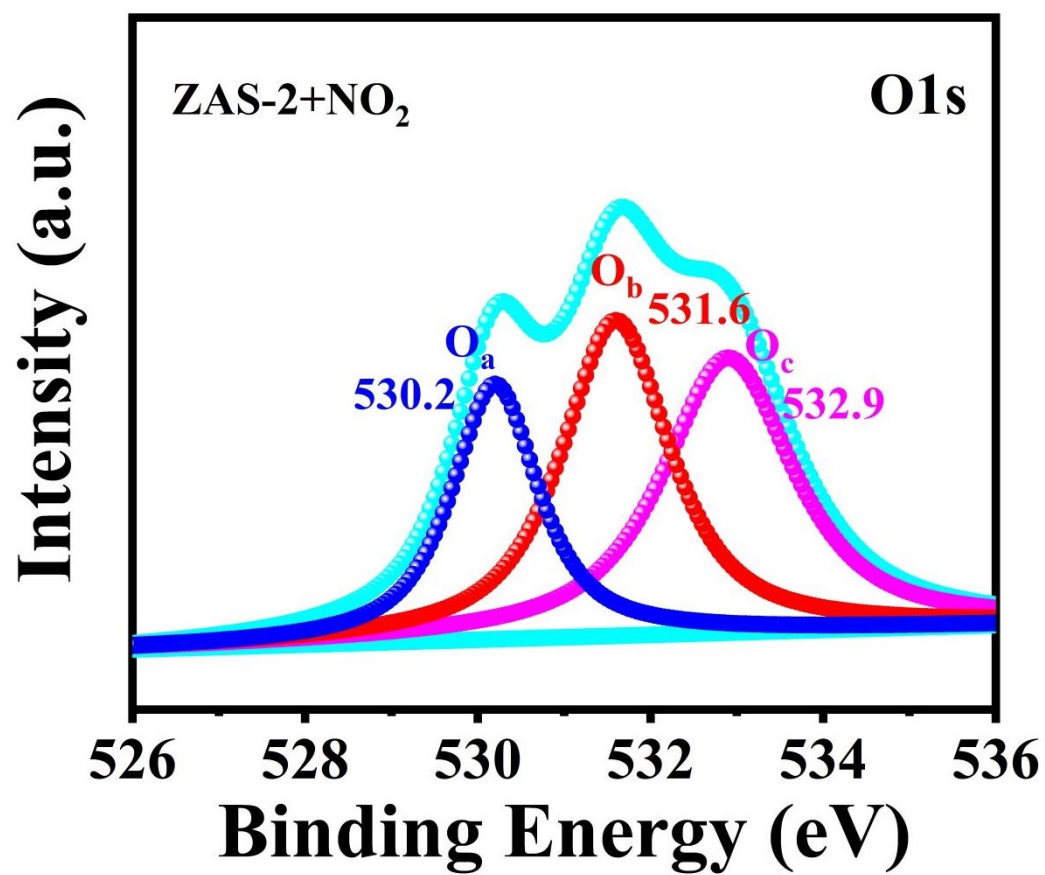

Fig. S3. O 1s high-resolution XPS spectra of ZAS-2+NO<sub>2</sub>

**Table S2.** O1s peak position and peak area ratio (%) of the four samples.

| Sample              | ZAS-1          |                |                | ZAS-2          |                |                | ZAS-3          |                |                | ZAS-2+NO <sub>2</sub> |                |                |
|---------------------|----------------|----------------|----------------|----------------|----------------|----------------|----------------|----------------|----------------|-----------------------|----------------|----------------|
| Peak                | O <sub>a</sub> | O <sub>b</sub> | O <sub>c</sub> | O <sub>a</sub> | O <sub>b</sub> | O <sub>c</sub> | O <sub>a</sub> | O <sub>b</sub> | O <sub>c</sub> | O <sub>a</sub>        | O <sub>b</sub> | O <sub>c</sub> |
| Peak position (eV)  | 529.8          | 531.0          | 531.6          | 530.2          | 531.2          | 532.5          | 530.1          | 531.3          | 532.6          | 530.2                 | 531.6          | 532.9          |
| Peak area ratio (%) | 24.7           | <b>44.7</b>    | 30.6           | 18.0           | <b>59.7</b>    | 22.3           | 21.2           | <b>51.1</b>    | 27.7           | 24.1                  | <b>38.8</b>    | 37.1           |

★O<sub>a</sub>: lattice oxygen; O<sub>c</sub>: oxygen deficiency/vacancies structure; O<sub>b</sub>: chemisorption oxygen.



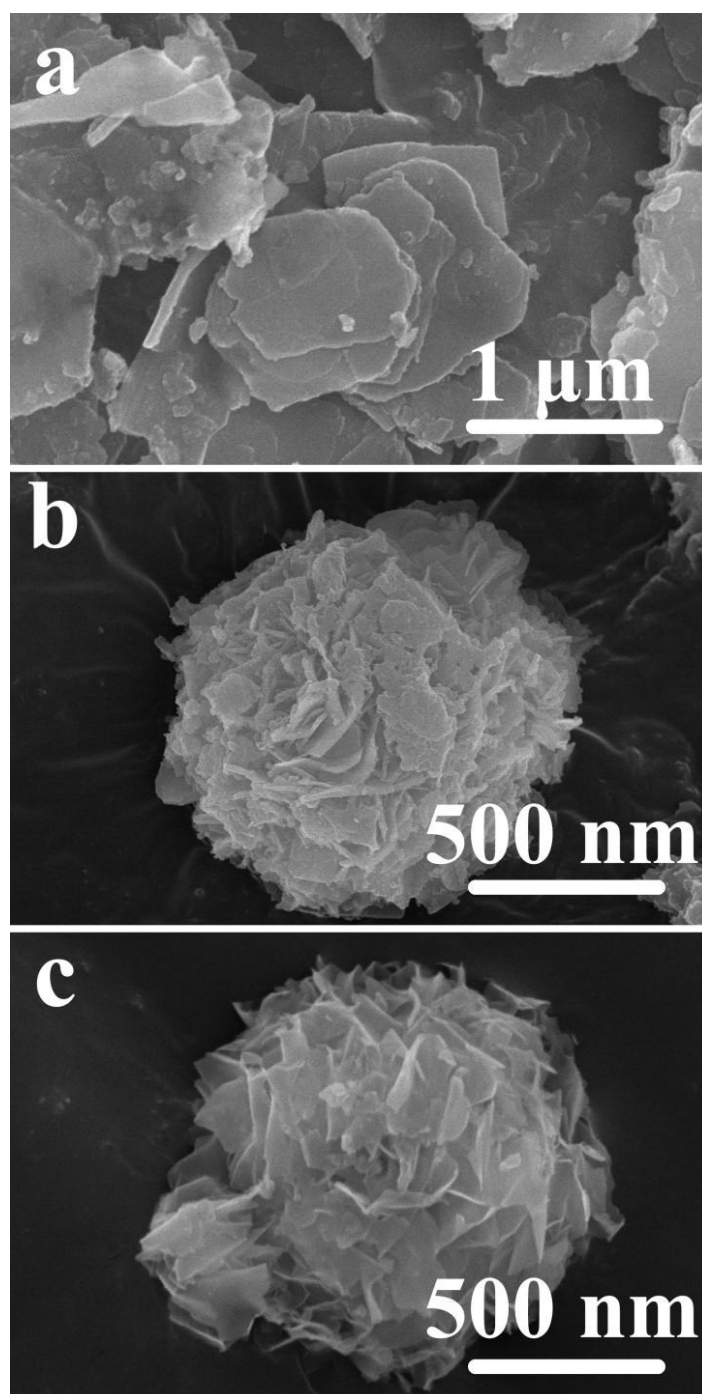

**Fig. S4.** SEM images of samples: (a) ZA-2; (b) ZAS-2\*; (c) ZAS-2.

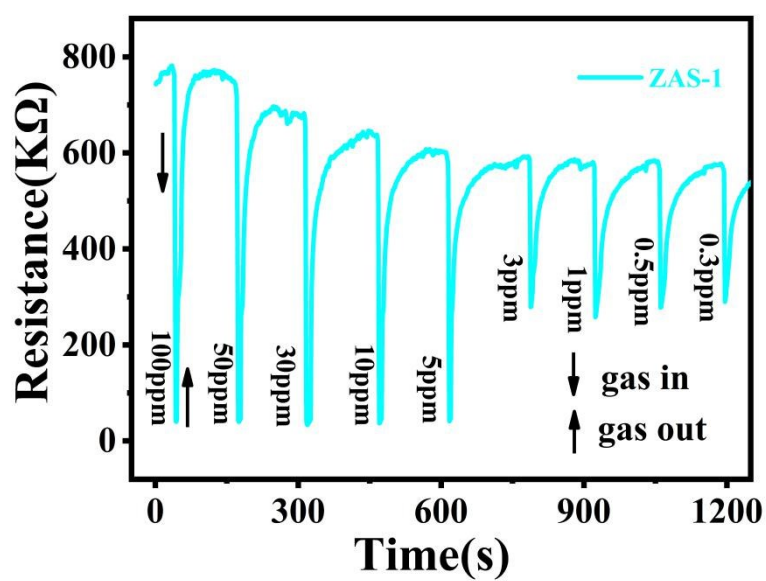

Fig. S5. Dynamical response transient of ZAS-1 to 100-0.3 ppm  $\text{NO}_2$ .

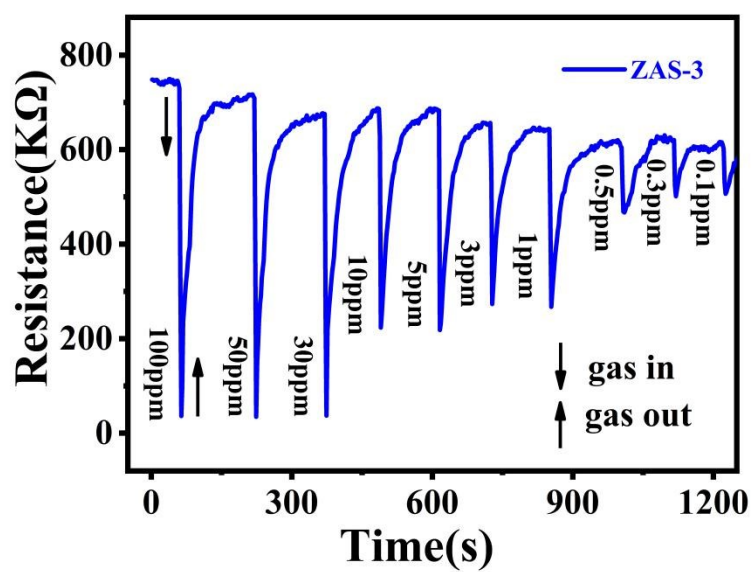

Fig. S6. Dynamical response transient of ZAS-3 to 100-0.1 ppm  $\text{NO}_2$ .

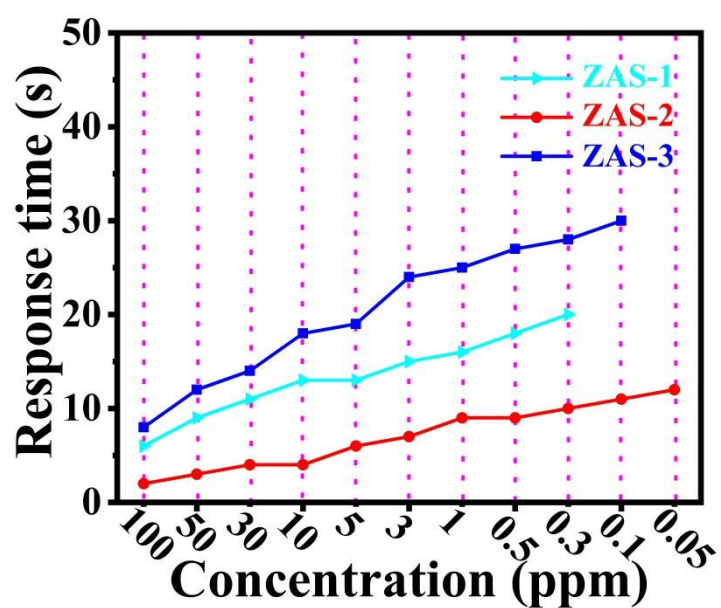

Fig. S7. Response time of the ZAS-1, ZAS-2 and ZAS-3 sensor.

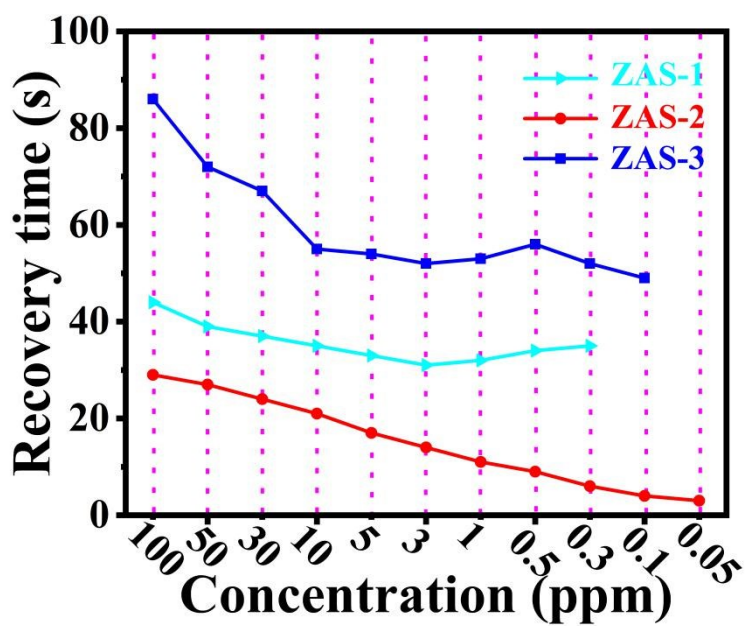

Fig. S8. Recovery time of the ZAS-1, ZAS-2 and ZAS-3 sensor.

**Table S3.** Response and response time of all samples to NO<sub>2</sub> at 25°C in air (RH: 26%)

| Sample                |     | ZAS-1              |                    | ZAS-2       |                         |                         | ZAS-3 |                    |                    |
|-----------------------|-----|--------------------|--------------------|-------------|-------------------------|-------------------------|-------|--------------------|--------------------|
| NO <sub>2</sub> (ppm) | R   | T <sub>R1</sub> /s | T <sub>R2</sub> /s | <b>R</b>    | <b>T<sub>R1</sub>/s</b> | <b>T<sub>R2</sub>/s</b> | R     | T <sub>R1</sub> /s | T <sub>R2</sub> /s |
| 100                   | 20  | 6                  | 44                 | <b>28.6</b> | <b>2</b>                | <b>29</b>               | 19    | 8                  | 86                 |
| 50                    | 19  | 9                  | 39                 | <b>23.9</b> | <b>3</b>                | <b>27</b>               | 18    | 12                 | 72                 |
| 30                    | 13  | 11                 | 37                 | <b>17.5</b> | <b>4</b>                | <b>24</b>               | 13.8  | 14                 | 67                 |
| 10                    | 5   | 13                 | 35                 | <b>10.1</b> | <b>4</b>                | <b>21</b>               | 7     | 18                 | 55                 |
| 5                     | 3   | 13                 | 33                 | <b>6.9</b>  | <b>6</b>                | <b>17</b>               | 4     | 19                 | 54                 |
| 3                     | 2.4 | 15                 | 31                 | <b>5.2</b>  | <b>7</b>                | <b>14</b>               | 3     | 24                 | 52                 |
| 1                     | 2.2 | 16                 | 32                 | <b>4.2</b>  | <b>9</b>                | <b>11</b>               | 2.2   | 25                 | 53                 |
| 0.5                   | 1.3 | 18                 | 34                 | <b>3.5</b>  | <b>9</b>                | <b>9</b>                | 2.1   | 27                 | 56                 |
| 0.3                   | 1.2 | 20                 | 35                 | <b>3.1</b>  | <b>10</b>               | <b>6</b>                | 1.7   | 28                 | 52                 |
| 0.1                   | --  | --                 | --                 | <b>2.62</b> | <b>11</b>               | <b>4</b>                | 1.3   | 30                 | 49                 |
| 0.05                  | --  | --                 | --                 | <b>2</b>    | <b>12</b>               | <b>3</b>                | --    | --                 | --                 |

★R: Response; T<sub>R1</sub>: Response time; T<sub>R2</sub>: Recovery time.

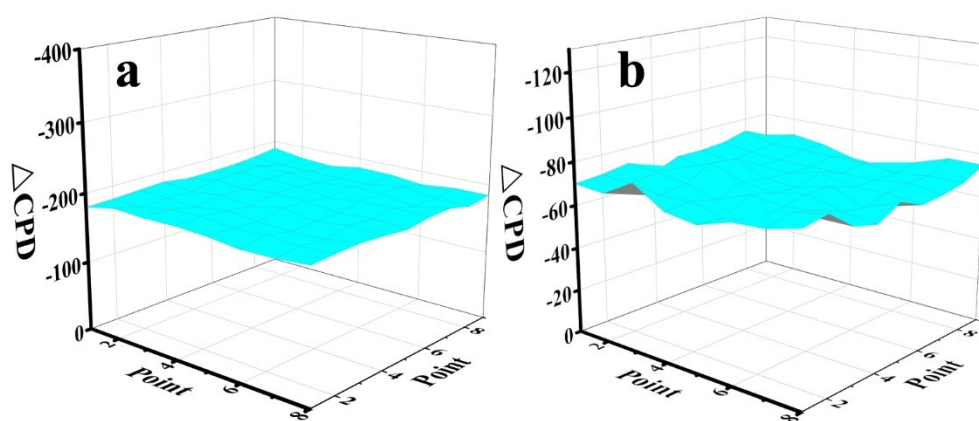

**Fig. S9.** Scheme of Kelvin probe of (a)  $\text{Al(OH)}_3$ , (b)  $\text{Zn(OH)}_2$ .
